# Supplementary material for: A sensitive aptasensor for the detection of β-amyloid oligomers based on metal–organic frameworks as electrochemical signal probes
Source: Royal Society of Chemistry journal article supplement (doi:10.1039/c8ay00736e), 2018-01-01
Supplement: c8ay00736e1.pdf [file c8ay00736e1.pdf]

## Supplementary material

### **A sensitive aptasensor for detection of $\beta$ -amyloid oligomers based on metal-organic frameworks as electrochemical signal probes**

Yanli Zhou,<sup>a,b\*</sup> Congming Li,<sup>b</sup> Xiaoqiao Li,<sup>a</sup> Xu Zhu,<sup>a</sup> Baoxian Ye,<sup>b</sup> and Maotian Xu<sup>a,b\*</sup>

<sup>a</sup>Henan Key Laboratory of Biomolecular Recognition and Sensing, College of Chemistry and Chemical Engineering, Shangqiu Normal University, Shangqiu 476000, P. R. China

\*e-mail: zhouyanli@mails.ucas.ac.cn; xumaotian@squ.edu.cn

<sup>b</sup>College of Chemistry and Molecular Engineering, Zhengzhou University, Zhengzhou 450001, P. R. China

#### **Determination of dissociation constants**

Shown in Fig. S1 are the fluorescence spectra of  $A\beta$  oligomers in 0.01 M PBS (pH 7.0) containing different amounts of aptamers  $A\beta$  oligomers. The fluorescence spectrum displays a peak at 303 nm with respect to tyrosine, and the fluorescence intensity decreased upon the addition of the aptamers because the complex of  $A\beta$  oligomers with aptamers produced the fluorescence quenching. The dissociation constants ( $K_d$ ) for the complex were determined from the fluorescence intensity as a function of the concentration of aptamer, based on the following equation [1]:

$$\frac{F_0 - F_L}{F_0 - F_\alpha} = \frac{([L] + [M_0] + K_d) - \sqrt{([L] + [M_0] + K_d)^2 - 4[M_0][L]}}{2M_0}$$

Where  $F_0$  and  $F_L$  are the fluorescence intensities of the  $A\beta$  oligomers at 303 nm before and after the addition of aptamers, respectively.  $F_\alpha$  is the minimum value of the intensity in the presence of aptamer.  $[L]$  and  $[M_0]$  are the concentration of aptamer and  $A\beta$  oligomer, respectively. Thus, the  $K_d$  could be calculated to be about 32 nM, which is consistent with the results in the literature [2].

[1] N. C. Maiti, D. Jiang, A. J. Wain, S. Patel, K. L. Dinh, F. M. Zhou, *J. Phys. Chem. B* 2008, 112, 8406–8411.

[2] K. Tsukakoshi, K. Abe, K. Sode and K. Ikebukuro, *Anal. Chem.* 2012, **84**, 5542–5547.

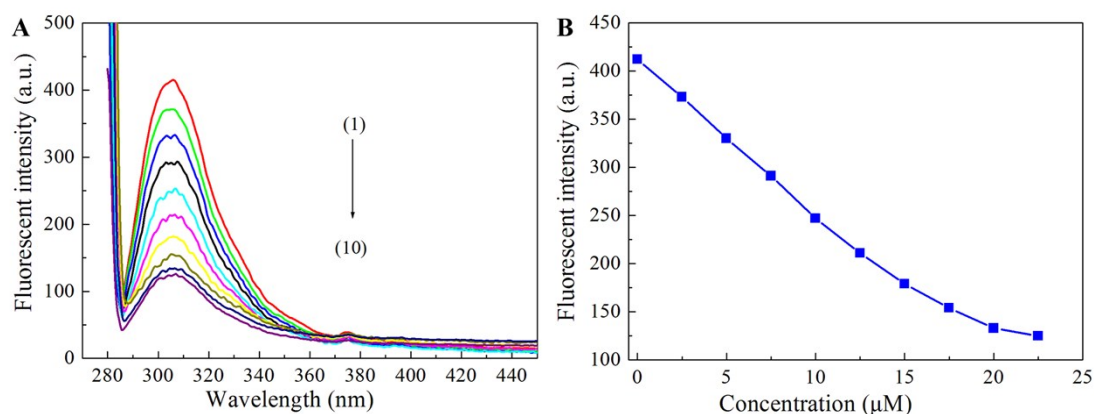

**Fig. S1.** (A) Fluorescence spectra of 10  $\mu\text{M}$  in 0.01 M PBS (pH 7.0) containing aptamers with different concentration: (1) 0, (2) 2.5, (3) 5.0, (4) 7.5, (5) 10.0, (6) 12.5, (7) 15.0, (8) 17.5, (9) 20.0, and (10) 22.5  $\mu\text{M}$ . The fluorescence spectra were obtained on the Cary Eclipse (Varian, America) with  $\lambda_{\text{ex}} = 280$  nm. (B) The Fluorescence intensity as a function of the concentration of the aptamer.
